# Supplementary material for: CT-based delta-radiomics nomogram to assess tumor regression grade in locally advanced gastric cancer patients following neoadjuvant chemotherapy
Source: Research Square preprint supplement (doi:10.21203/rs.3.rs-7072201/v1), 2025-07-14
Supplement: Supplementary file 1 [file 809860f3b20a859b82e512ad.docx]

**Supplementary information for**

**CT-based delta-radiomics nomogram to assess tumor regression grade in locally advanced gastric cancer patients following neoadjuvant chemotherapy**

Supplementary Appendix 1: The inclusion criteria and the exclusion criteria

Supplementary Appendix 2: Neoadjuvant chemotherapy regimens\

Supplementary Appendix 3: Tumor regression grade

Supplementary Appendix 4: CT examination acquisition and preprocessing

Supplementary Appendix 5: Radiomics feature extraction

Supplementary Appendix 6: Statistical Analysis and Packages of R software

**Supplementary Appendix 1. The inclusion criteria and the exclusion criteria**

The inclusion criteria were as follows: (1) histologically confirmed primary gastric adenocarcinoma; (2) diagnosis of locally advanced disease (cT2-4NxM0) according to the American Joint Committee on Cancer (AJCC) TNM Staging Manual (8th edition); (3) completion of standardized NAC regimen and subsequent radical surgery at our center; (4) availability of two contrast-enhanced abdominal CT scans, within 30 days pre-neoadjuvant chemotherapy (pre-NAC) treatment, and within 30 days post-neoadjuvant chemotherapy (post-NAC) completion prior to surgery; (5) complete clinicopathological records.

The exclusion criteria were as follows: (1) Poor CT image quality or significant artifacts; (2) prior anticancer therapy before NAC; (3) history of concurrent malignancies. The detailed enrollment process is illustrated in Figure 1.

**Supplementary Appendix 2. Neoadjuvant chemotherapy regimens**

This retrospective study only included patients receiving NAC regimens recommended by the National Comprehensive Cancer Network (NCCN) and Chinese Society of Clinical Oncology (CSCO) guidelines. NAC regimens were categorized as: doublet-drug combination: SOX (S-1, oxaliplatin)/ XELOX (capecitabine, oxaliplatin)/ DS (docetaxel, S-1)/ TP (paclitaxel, cisplatin)/ TS (paclitaxe,S-1), etc.; and triplet-drug combination: FLOT (5-fluorouracil plus leucovorin, oxaliplatin and docetaxel)/ FOLFOX (5-fluorouracil, calcium leucovorin/ calcium levofolinate, oxaliplatin)/ TOS (S-1, oxaliplatin, paclitaxel) . All patients followed the standard course of NAC regimens.

**Supplementary Appendix 3. Tumor regression grade**

TRG 0 (complete response): no viable cancer cells identified; TRG 1 (moderate response): only isolated or small clusters of cancer cells remained; TRG 2 (minimal response): residual cancer cells with significant tumor regression, but exceeding isolated cells or sparse clusters; TRG 3 (poor response): extensive residual cancer cells without evidence of significant regression.

**Supplementary Appendix 4. CT examination acquisition and preprocessing**

All 147 patients underwent contrast-enhanced abdominal CT scans within 30 days before initiating NAC and within 30 days after completing NAC before surgery. Scanning was performed by using a 64-slice spiral CT scanner (VCT, GE Healthcare, Chicago, IL, USA) or an Aquilion ONE 320 slice CT scanner (Canon, Tokyo, Japan). Portal venous phase contrast-enhanced CT images were retrieved from the Picture Archiving and Communication System (PACS) for radiomic feature extraction, as tumor tissue contrast with adjacent normal tissues was better displayed during the portal venous phase than during the arterial phase. All imaging data were resampled to isotropic voxels of 1×1×1 mm3.

**Supplementary Appendix 5. Radiomics feature extraction**

In our study, all radiomics features were extracted using the open source Pyradiomics package Version3.1.0 (https://pyrad iomics.readthedocs.io/en/3.1.0/). A total 851 quantitative features were calculated from each ROI, including 18 first-order statistics, 14 features of shape, 24 features of grey-level co-occurrence matrix (GLCM), 16 features of grey-level run-length matrix (GLRLM), 16 features of grey-level size- zone matrix (GLSZM), 14 gray level dependence matrix GLDM), 5 features of gray-level dependence matrix (NGTDM) and 744 features of wavelet features.

**Supplementary Appendix 6. Statistical Analysis and Packages of R software**

SPSS statistical software version 27.0 (IBM) and R software version 4.4.2 (http://www.r-project.org) were used for analysis in our study. Categorical variables were analyzed using the chi-square test or Fisher's exact test and continuous variables were analyzed using Student's t-test. Notably, in the univariate logistic regression analysis, a lenient screening criterion of p<0.20 was used. And a two-sided p-value < 0.05 was considered statistically significant in other statistical analysis.

Lasso binary logistic regression model analysis was performed by using the “glmnet” package. The ROC curves were plotted using the “pROC” package. Nomograms and calibration curves were conducted with the “rms” packages.The Hosmer-Lemeshow test was performed using the “Resource Selection” package. DCA was performed with the function of “dca.R”.

**Supplementary Figures:**

**Figure S1** Lasso logistic regression algorithm selected CT-radiological features. A is preCT-RS P+L, pre-neoadjuvant chemothrapy computed tomography radiomics signatures which were constructed by delineating the primary tumor and the largest lymph node. B is postCT-RS P+L, post-neoadjuvant chemothrapy computed tomography radiomics signatures which were constructed by delineating the primary tumor and the largest lymph node. C is delCT-RS P+L, delta computed tomography radiomics signatures which were constructed by delineating the primary tumor and the largest lymph node. D is preCT-RS P, pre-neoadjuvant chemothrapy computed tomography radiomics signatures which were constructed by delineating the primary tumor. E is postCT-RS P, post-neoadjuvant chemothrapy computed tomography radiomics signatures which were constructed by delineating the primary tumor. F is delCT-RS P, delta computed tomography radiomics signatures which were constructed by delineating the primary tumor.


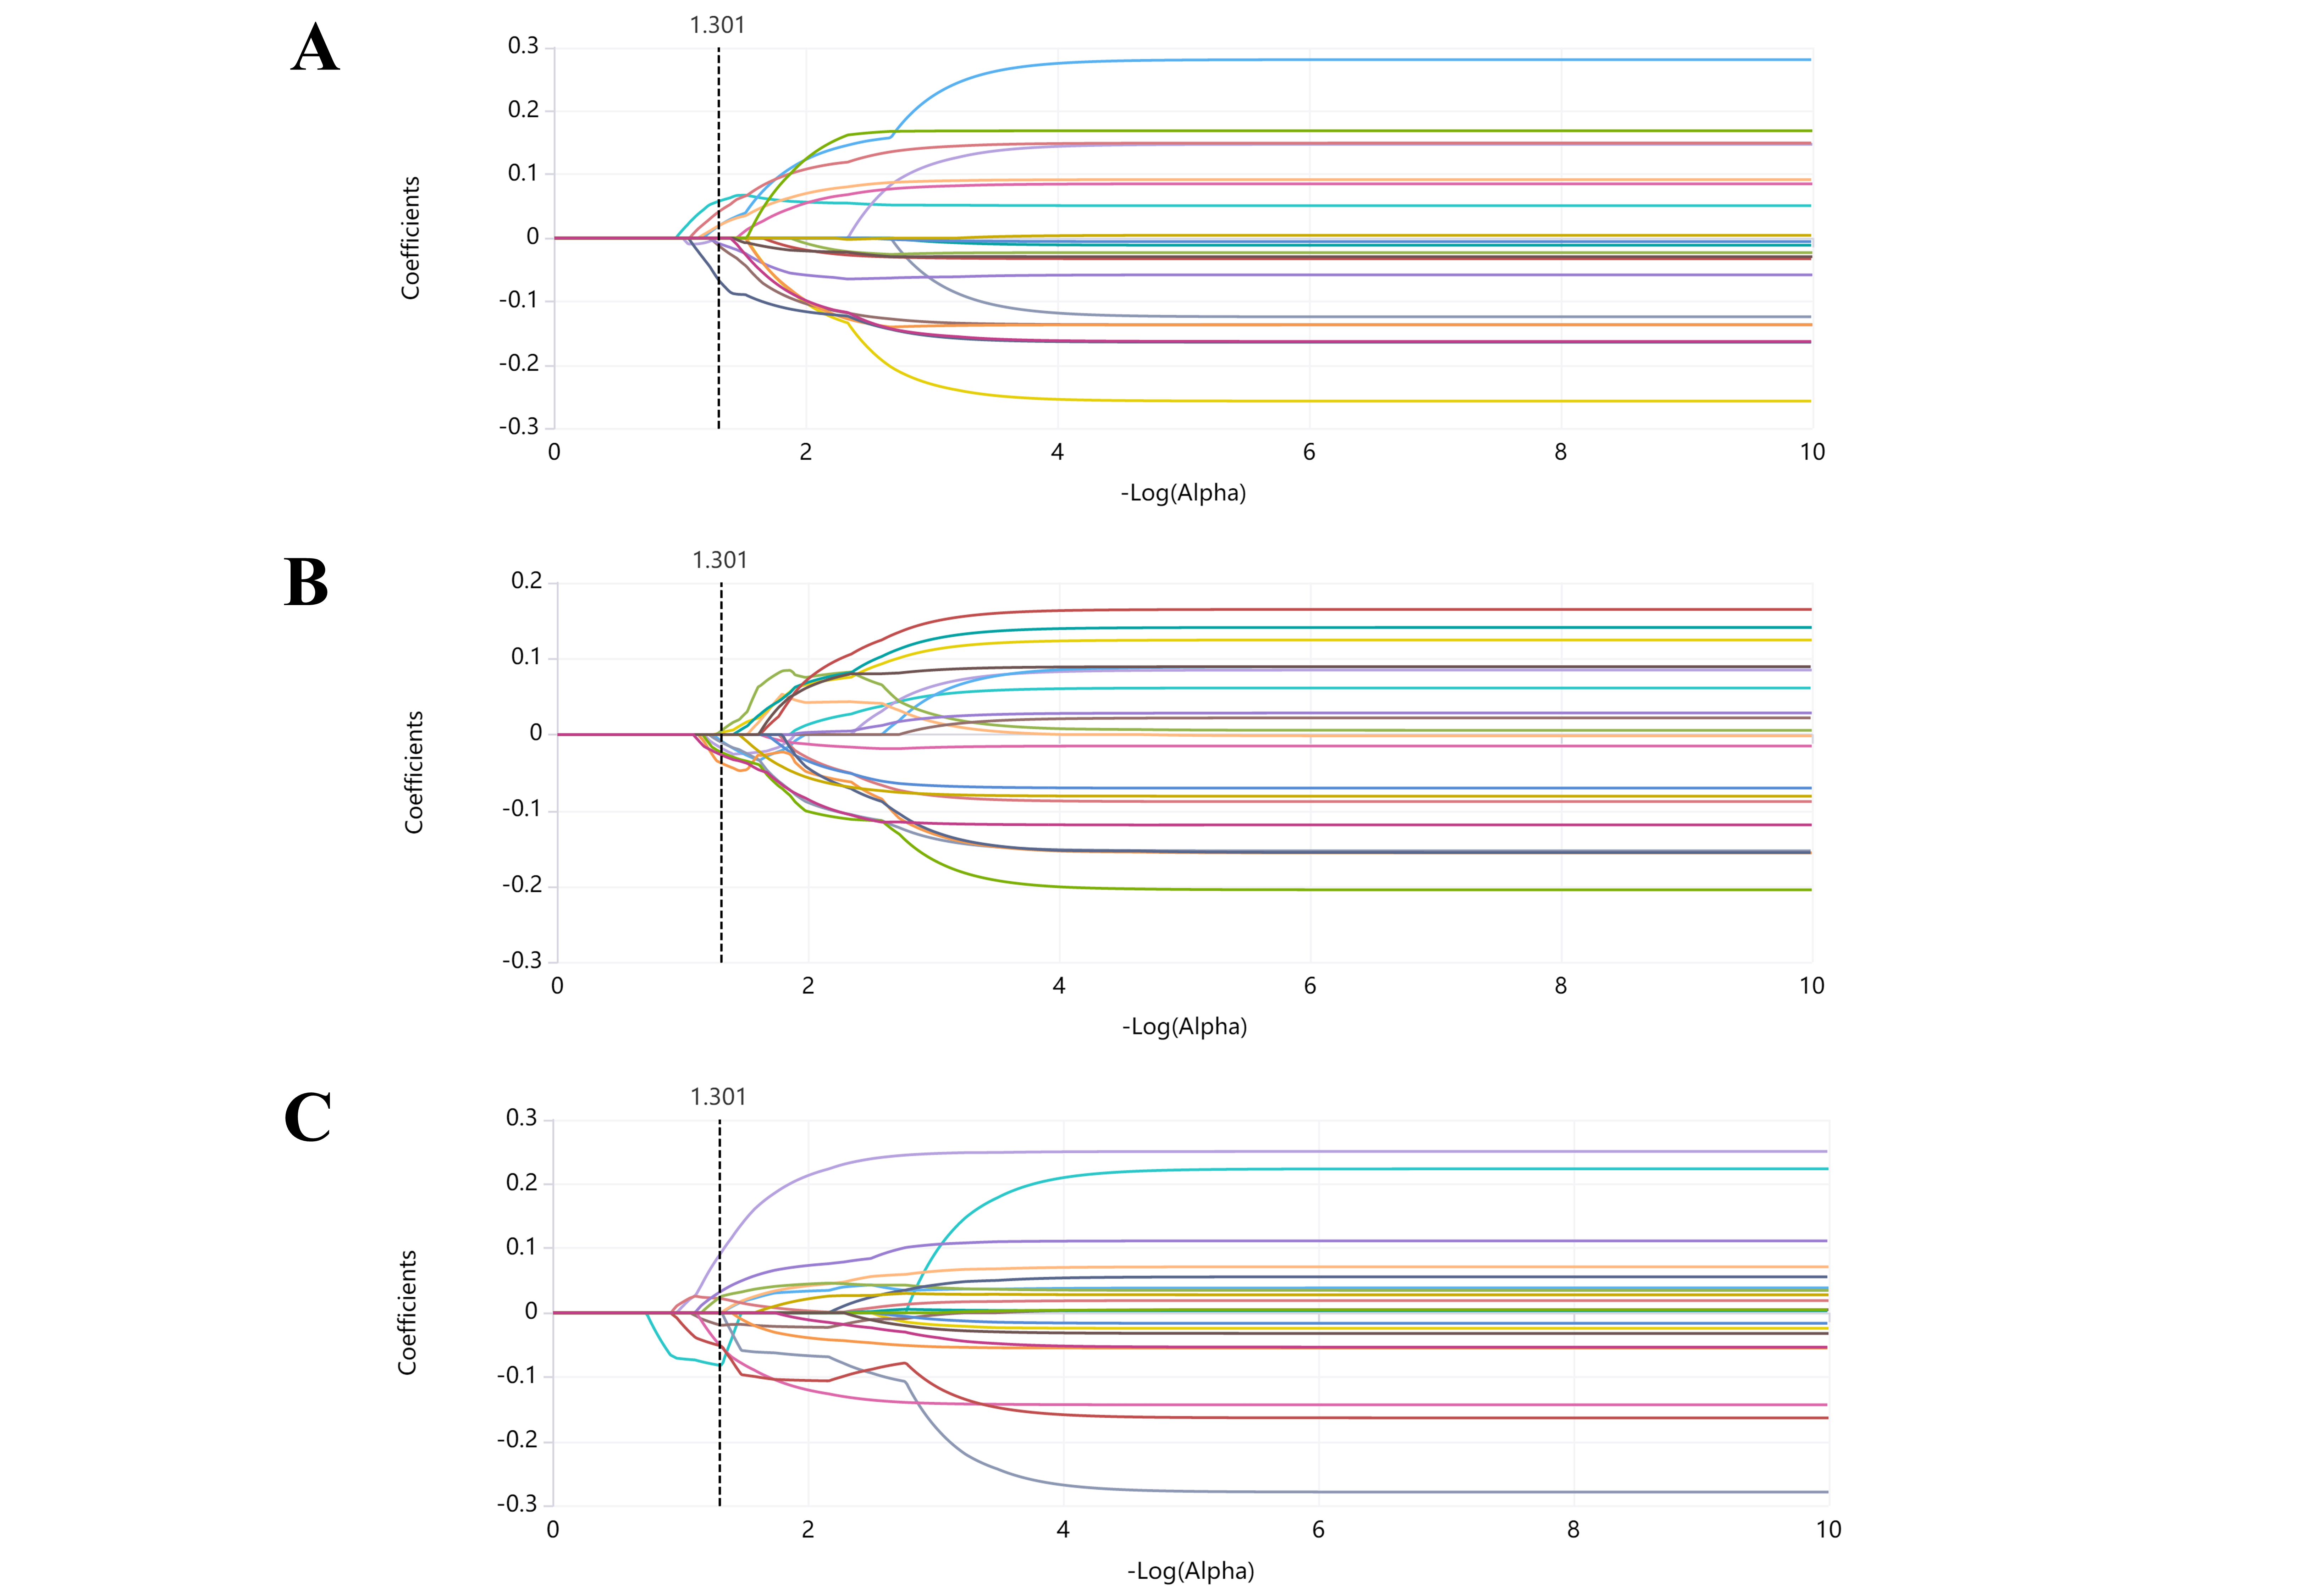
**
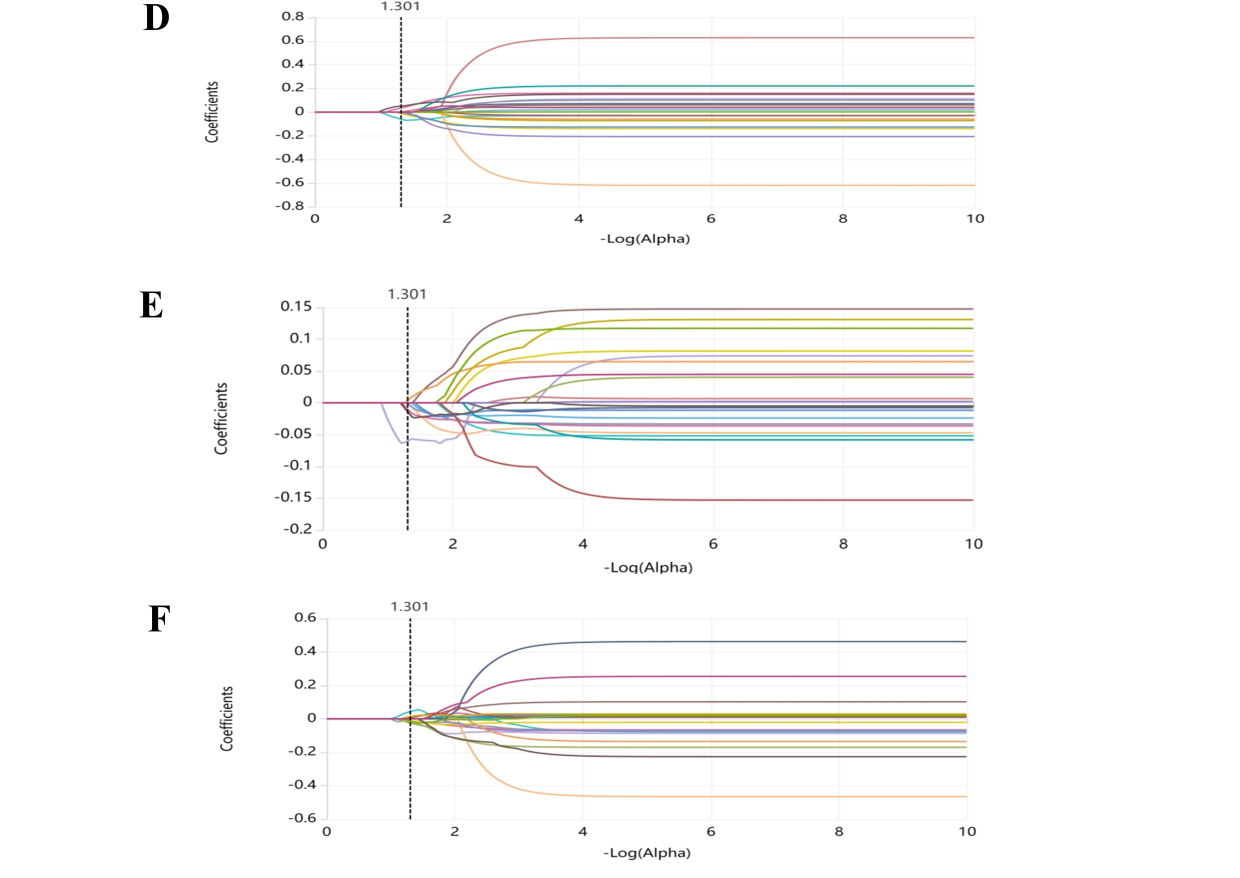
**

**Figure S2** Construction of RS-CN. A fusion signature of RS-CN was built from the delCT-RS P+L and the cT_stage. Note: RS-CN, radiomic signatures-clinical-nomogram; delCT-RS, delta computed tomography radiomics signatures; P+L, primary tumor and the largest lymph node; cT_stage, clinical T stage

**
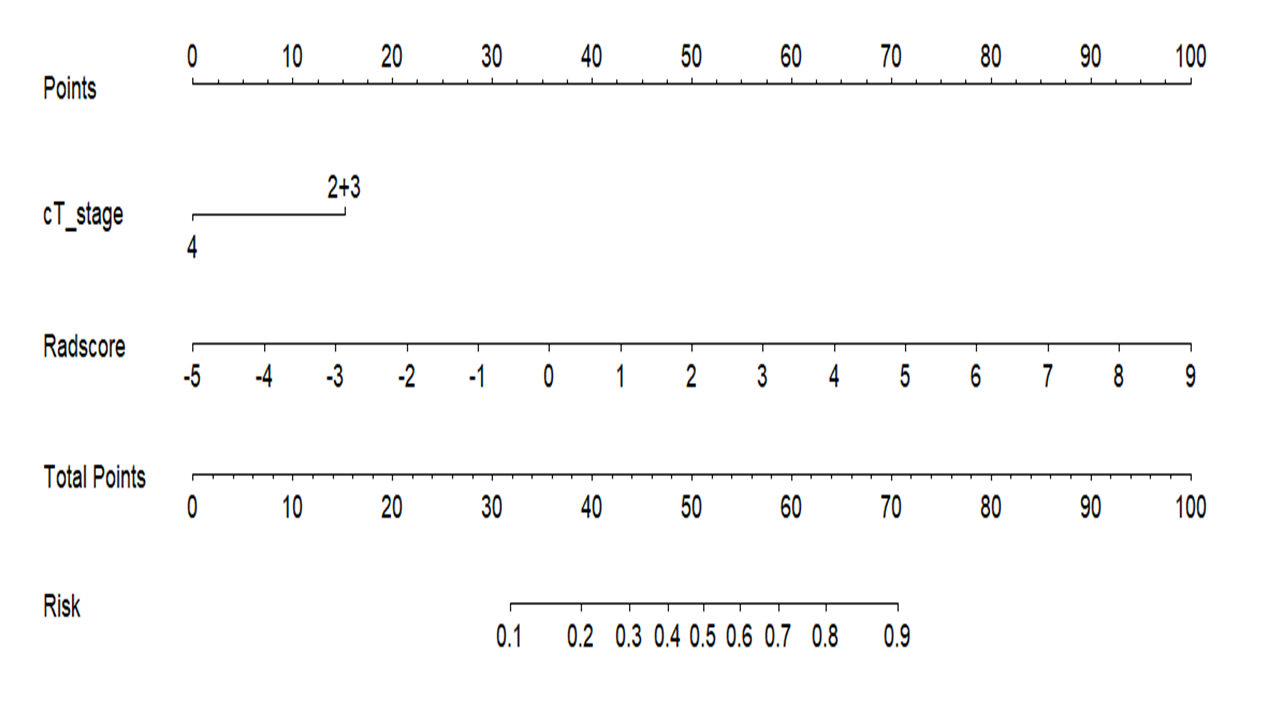
**

**Figure S3** The relationships between all kinds of models and NAC response in the training cohort (A) and validation cohort (B). * p < 0.05; ** p < 0.01; *** p < 0.001. Note: pre-scores, predict scores; delCT-RS P+L, delta computed tomography radiomics signatures which were constructed by delineating the primary tumor and the largest lymph node; RS-CN, radiomic signatures-clinical-nomogram; NAC, neoadjuvant chemotherapy; GR, good response; PR, poor response.

**
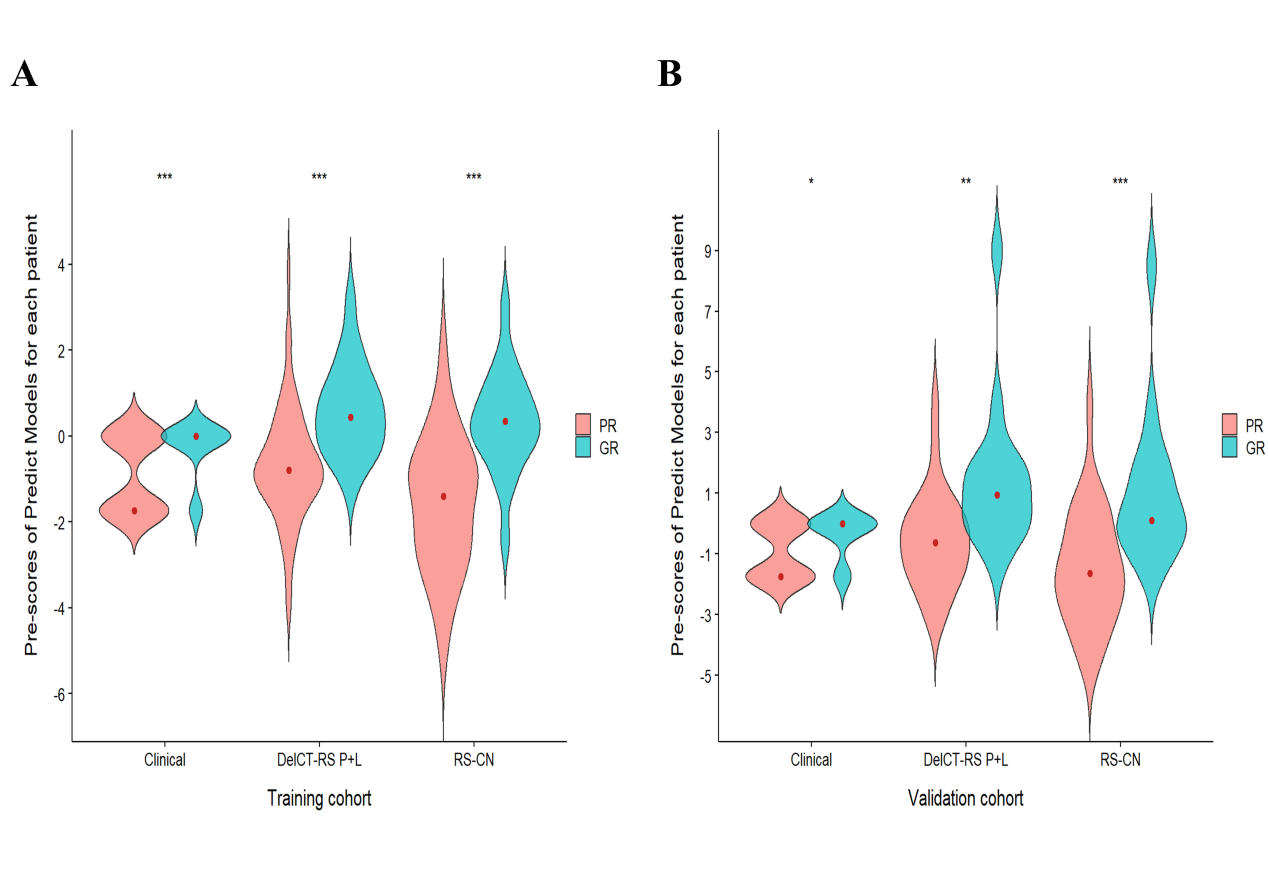
**

**Supplementary Tables:**

**Table S1** The CT scanning parameters.

| **Parameters** | **First Affiliated Hospital of Wenzhou Medical University** |
| --- | --- |
| CT Scanner | 64-slice spiral CT scanner (VCT, GE Healthcare, Chicago, IL, USA) or Aquilion ONE 320 slice CT scanner (Canon, Tokyo, Japan) |
| CT tube voltage | 120kVp |
| CT tube current | 150-190mA |
| CT detector collimation | 8×2.5mm or 64×0.625mm |
| Contrast agent concentration | 370 mgI/mL |
| Contrast agent dosage | 1.5 mg/kg body weight |
| Contrast agent infused rate | 3.5 ml/s |
| Venous phase CT | 60 s after injection |
| Image matrix | 512×512 |
| Reconstruction image thickness | 1-1.5mm |

**Table S2** Results of radiomics feature selection and Rad-score building

| **Rad-score** | **Features** | **Coefficient** |
| --- | --- | --- |
| PreCT-RS P+L | (Intercept) | 0.365 |
|  | wavelet_LLL_glcm_MaximumProbability | 0.058 |
|  | wavelet_HHL_glszm_LargeAreaLowGrayLevelEmphasis | 0.041 |
|  | original_shape_Elongation | 0.019 |
|  | wavelet_HHH_glcm_ClusterProminence | 0.018 |
|  | original_glszm_GrayLevelNonUniformity | -0.001 |
|  | wavelet_LHL_glcm_Imc1 | -0.008 |
|  | wavelet_LHL_ngtdm_Contrast | -0.011 |
|  | original_shape_LeastAxisLength | -0.065 |
| PreCT-RS P | (Intercept) | 0.365 |
|  | wavelet_LLL_glcm_MaximumProbability | 0.051 |
|  | wavelet_HHL_glszm_LargeAreaLowGrayLevelEmphasis | 0.034 |
|  | wavelet_HLH_glcm_ClusterProminence | 0.001 |
|  | wavelet_LLH_glszm_GrayLevelNonUniformity | -0.005 |
|  | wavelet_LHL_ngtdm_Contrast | -0.012 |
|  | original_shape_Maximum3DDiameter | -0.059 |
| PostCT-RS P+L | (Intercept) | 0.365 |
|  | wavelet_HHL_glcm_Idm | 0.004 |
|  | original_ngtdm_Coarseness | 0.002 |
|  | original_firstorder_Mean | -0.008 |
|  | wavelet_LLL_glcm_Imc2 | -0.010 |
|  | wavelet_HLH_glrlm_LongRunEmphasis | -0.017 |
|  | wavelet_LLL_firstorder_10Percentile | -0.023 |
|  | wavelet_LLH_firstorder_Median | -0.027 |
|  | wavelet_HHL_glcm_SumSquares | -0.037 |
| PostCT-RS P | (Intercept) | 0.365 |
|  | original_shape_Elongation | 0.003 |
|  | original_firstorder_Mean | -3.44E-05 |
|  | original_glszm_LargeAreaHighGrayLevelEmphasis | -0.010 |
|  | wavelet_HHL_glszm_GrayLevelNonUniformity | -0.013 |
|  | wavelet_LHL_glszm_SizeZoneNonUniformity | -0.060 |
| DelCT-RS P+L | (Intercept) | -0.226 |
|  | wavelet_LHH_gldm_SmallDependenceLowGrayLevelEmphasis | 0.640 |
|  | original_shape_Maximum2DDiameterColumn | 0.309 |
|  | wavelet_HLL_glszm_LargeAreaHighGrayLevelEmphasis | 0.263 |
|  | wavelet_LLL_glcm_Imc1 | 0.136 |
|  | wavelet_HHL_glcm_Id | 0.124 |
|  | original_firstorder_10Percentile | -0.203 |
|  | wavelet_HHH_firstorder_Kurtosis | -0.214 |
|  | original_shape_Elongation | -0.233 |
|  | wavelet_LHH_gldm_DependenceEntropy | -0.382 |
|  | original_firstorder_RootMeanSquared | -0.538 |
|  | wavelet_LLL_glszm_LargeAreaLowGrayLevelEmphasis | -0.600 |
|  | wavelet_LLH_firstorder_10Percentile | -0.740 |
| DelCT-RS P | (Intercept) | 0.365 |
|  | wavelet_LHL_glcm_Imc1 | 0.043 |
|  | wavelet_LHH_ngtdm_Coarseness | 0.013 |
|  | wavelet_HHH_glcm_ClusterShade | 0.006 |
|  | original_firstorder_Mean | -0.012 |
|  | wavelet_HHL_glszm_LargeAreaLowGrayLevelEmphasis | -0.012 |
|  | wavelet_HHL_glcm_ClusterTendency | -0.013 |
|  | original_gldm_DependenceVariance | -0.014 |
|  | wavelet_LLH_firstorder_Uniformity | -0.021 |
|  | wavelet_LLL_glszm_LargeAreaLowGrayLevelEmphasis | -0.025 |

Note**:** P+L, primary tumor and the largest lymph node; P, primary; preCT-RS, pre-neoadjuvant chemothrapy computed tomography radiomics signatures; postCT-RS, post-neoadjuvant chemothrapy computed tomography radiomics signatures; delCT-RS, delta computed tomography radiomics signatures
